# Supplementary material for: Tick galactosyltransferases are involved in α-Gal synthesis and play a role during Anaplasma phagocytophilum infection and Ixodes scapularis tick vector development
Source: PubMed Central journal article supplement (PMC6154994; doi:10.1038/s41598-018-32664-z), 2018-09-21
Supplement: 41598_2018_32664_MOESM1_ESM.pdf [file 41598_2018_32664_MOESM1_ESM.pdf]

**Tick galactosyltransferases are involved in  $\alpha$ -Gal synthesis and play a role during *Anaplasma phagocytophilum* infection and *Ixodes scapularis* tick vector development**

Alejandro Cabezas-Cruz<sup>1,†,\*</sup>, Pedro J Espinosa<sup>2,†</sup>, Pilar Alberdi<sup>2,†</sup>, Ladislav Šimo<sup>1,†</sup>, James J Valdés<sup>3,4,5</sup>, Lourdes Mateos-Hernández<sup>1,2</sup>, Marinela Contreras<sup>2</sup>, Margarita Villar Rayo<sup>2</sup>, José de la Fuente<sup>2,6,\*</sup>

<sup>1</sup>UMR BIPAR, INRA, Ecole Nationale Vétérinaire d'Alfort, ANSES, Université Paris-Est, Maisons-Alfort, France.

<sup>2</sup>SaBio. Instituto de Investigación en Recursos Cinegéticos IREC (CSIC-UCLM-JCCM), 13005 Ciudad Real, Spain.

<sup>3</sup>Faculty of Science, University of South Bohemia, České Budějovice, Czech Republic.

<sup>4</sup>Institute of Parasitology, Biology Center, Czech Academy of Sciences, 37005 České Budějovice, Czech Republic.

<sup>5</sup>Department of Virology, Veterinary Research Institute, Brno, Czech Republic

<sup>6</sup>Department of Veterinary Pathobiology, Center for Veterinary Health Sciences, Oklahoma State University, Stillwater, OK 74078 USA.

† Equal contribution

\* **Correspondence:** Alejandro Cabezas-Cruz, [cabezasalejandrocruz@gmail.com](mailto:cabezasalejandrocruz@gmail.com); José de la Fuente, [jose\\_delafuente@yahoo.com](mailto:jose_delafuente@yahoo.com)

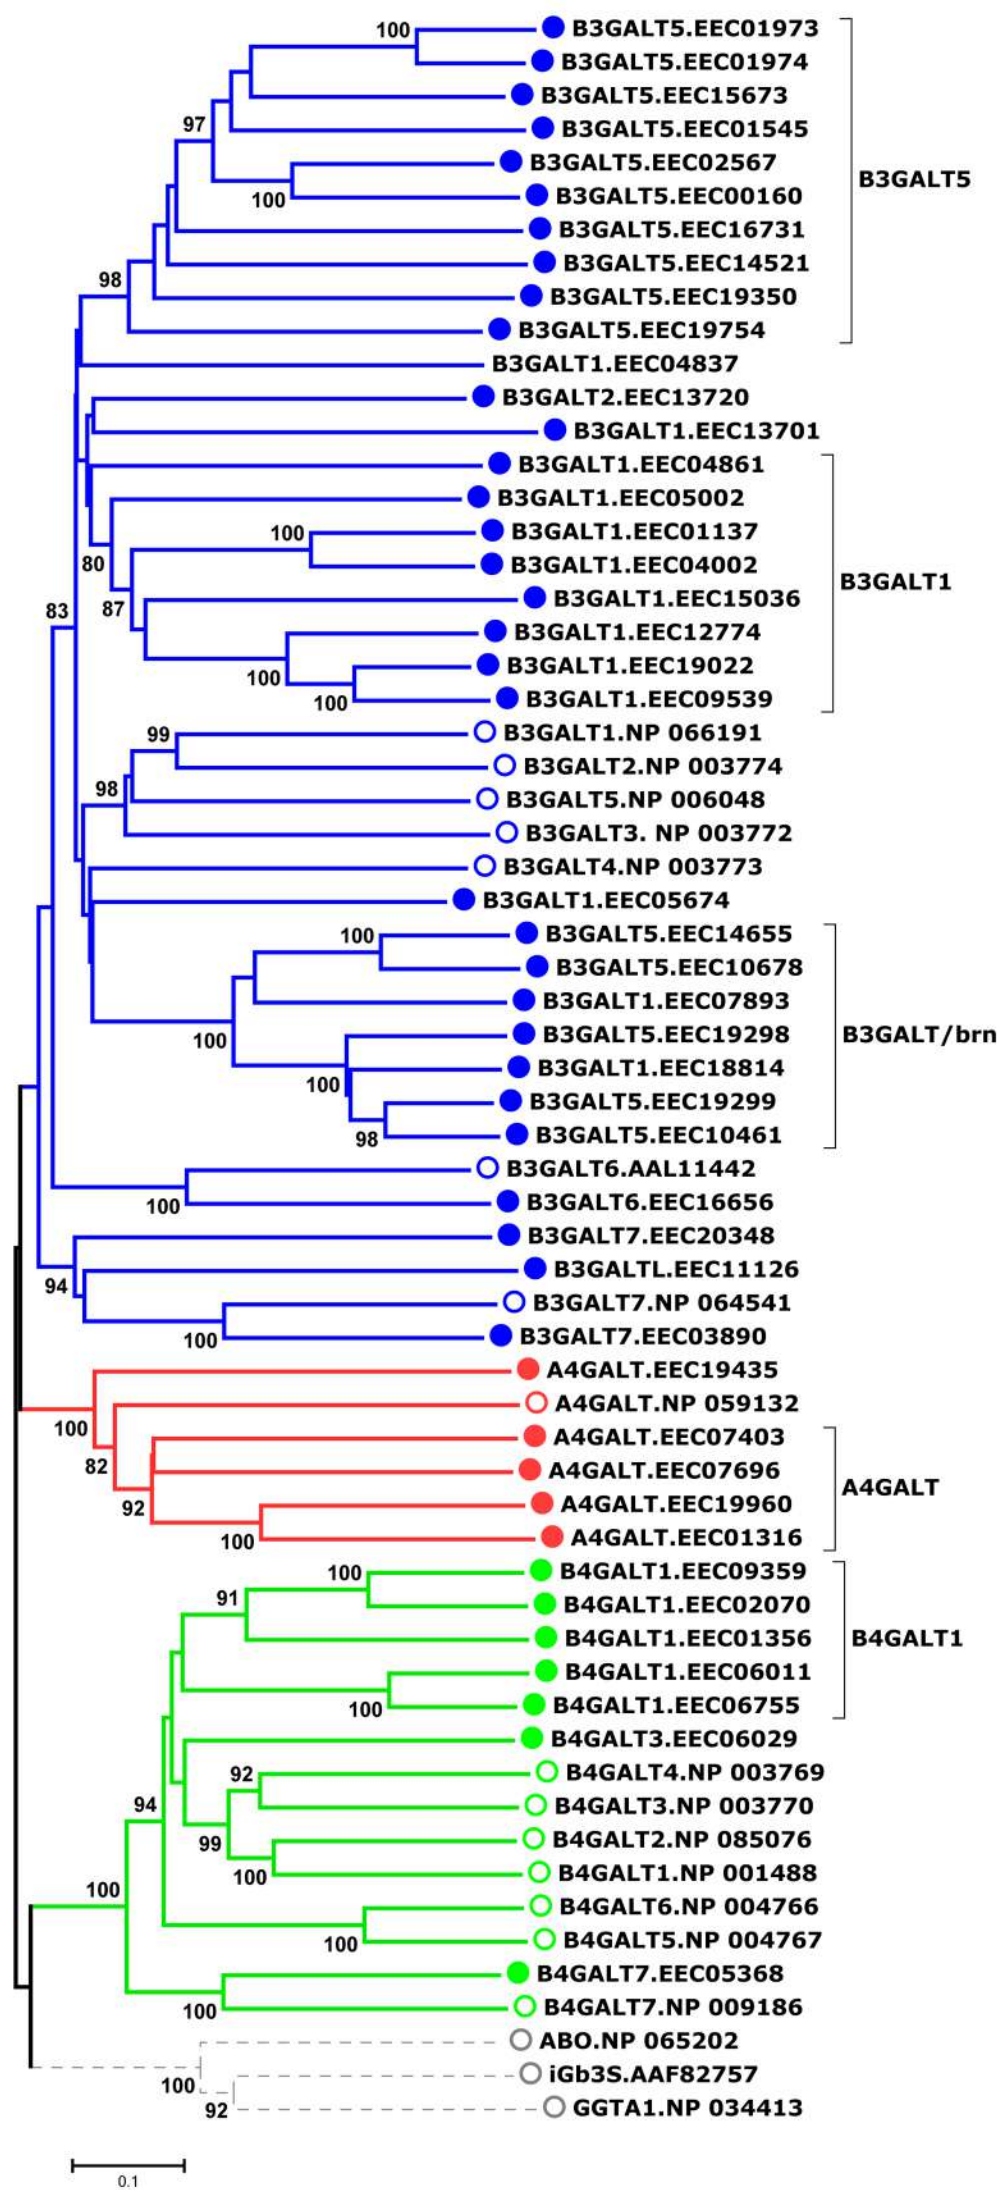

**Supplementary Figure 1.** Phylogenetic tree of mammal and tick GALTs. The figure displays the phylogenetic relation between mammal (open circles) and *I. scapularis* (closed circles) GALT protein sequences. The four GalT families found in mammals were included in the analysis  $\alpha$ 1-3 GALTs ( $\alpha$ 3, gray),  $\alpha$ 1-4 GALTs ( $\alpha$ 4, red),  $\beta$ 1-3 GALTs ( $\beta$ 3, blue) and  $\beta$ 1-4 GALTs ( $\beta$ 4, green). Dashed lines represent that no tick ortholog was found for these proteins. Human protein sequences were used, except for the  $\alpha$ 3 GGTA1 and iGb3 synthase (iGb3S) were mice sequences were used. Mammalian GalT protein sequences were previously reported<sup>1</sup>. Protein accession numbers are shown. Clusters that were collapsed in Figure 1 are labelled as B3GALT1, B3GALT5, A4GALT, B4GALT1 and B3GALT/brn.



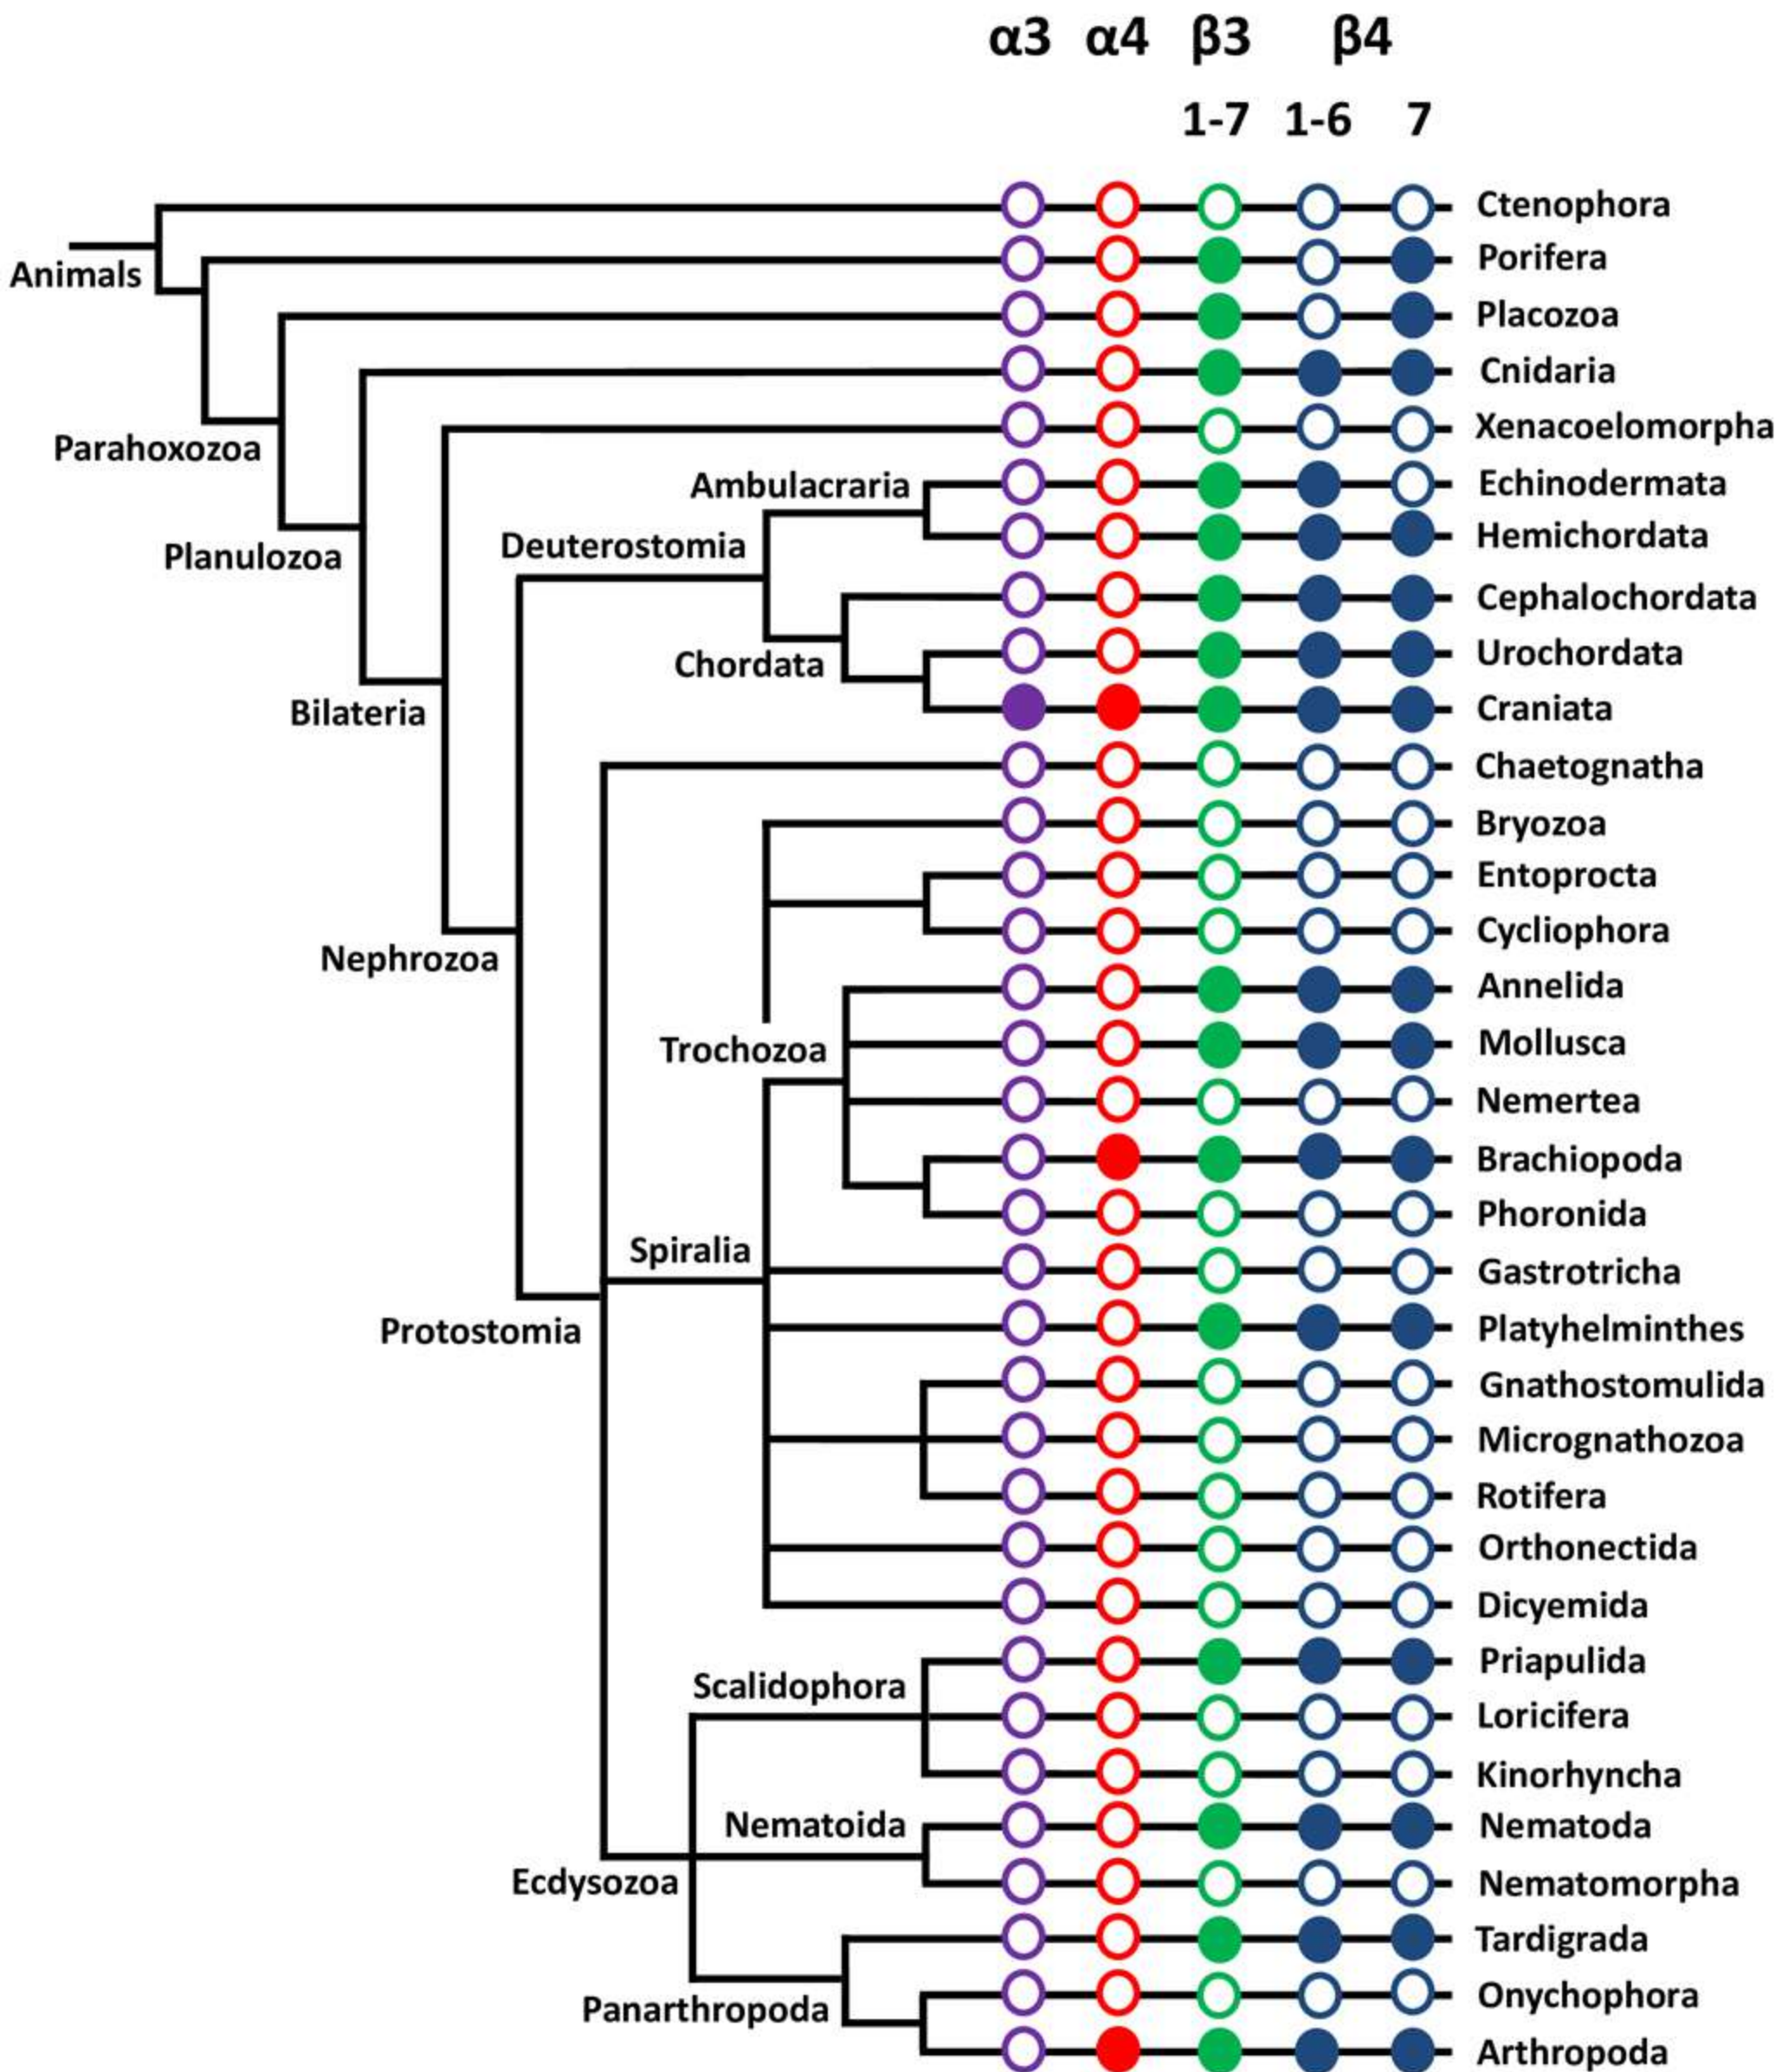

**Supplementary Figure 2.** Distribution of GALT families in Metazoa. The figure displays the distribution of  $\alpha 1-3$  GALTs ( $\alpha 3$ , purple),  $\alpha 1-4$  GALTs ( $\alpha 4$ , red),  $\beta 1-3$  GALTs ( $\beta 3$ , green) and  $\beta 1-4$  GALTs ( $\beta 4$ , blue) in the phylogenetic tree of Metazoan. The numbers 1-7, 1-6 and 7 indicate some GALT families (i.e.  $\beta 3$  and  $\beta 4$ ) for which at least one family member was identified. Open and closed circles represent absence and presence of GALT orthologs, respectively. The phylogenetic tree of Metazoan was compiled and modified from published sources<sup>74</sup>.

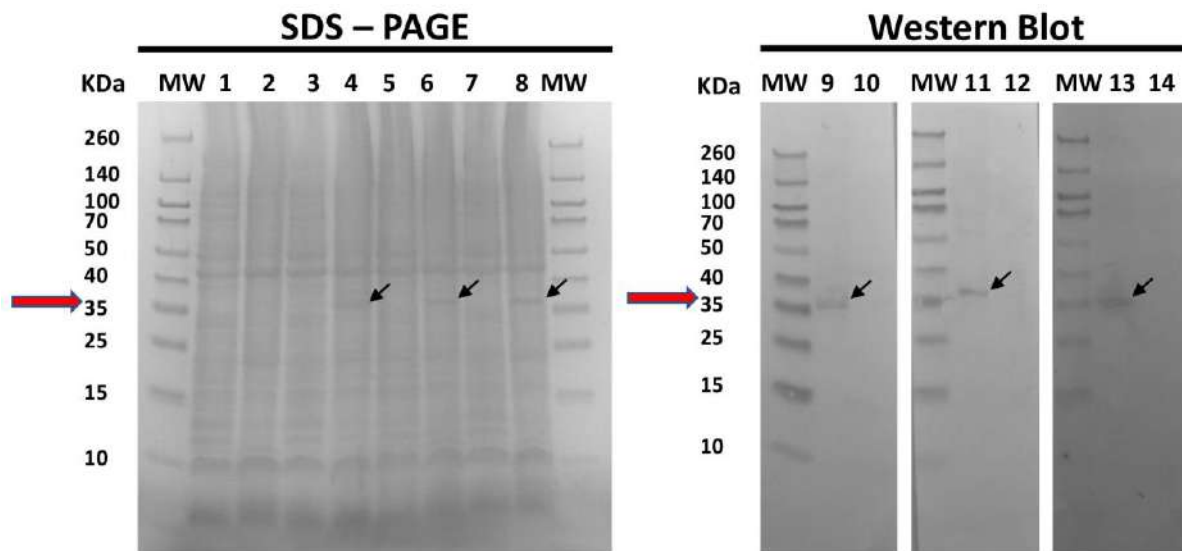

**Legend**

MW. Molecular weight marker

→ Expected size of recombinant proteins

↙ Recombinant proteins

**SDS – PAGE**

1. *E. coli* BL21 cells transformed with empty plasmid before induction
2. *E. coli* BL21 cells transformed with empty plasmid after induction
3. *E. coli* BL21 cells transformed with *a4galt-1* before induction
4. *E. coli* BL21 cells transformed with *a4galt-1* after induction
5. *E. coli* BL21 cells transformed with *b4galt7* before induction
6. *E. coli* BL21 cells transformed with *b4galt7* after induction
7. *E. coli* BL21 cells transformed with *a4galt-2* before induction
8. *E. coli* BL21 cells transformed with *a4galt-2* after induction

**Western Blot**

9. *E. coli* BL21 cells transformed with *a4galt-1*
10. *E. coli* BL21 cells transformed with empty plasmid
11. *E. coli* BL21 cells transformed with *b4galt7*
12. *E. coli* BL21 cells transformed with empty plasmid
13. *E. coli* BL21 cells transformed with *a4galt-2*
14. *E. coli* BL21 cells transformed with empty plasmid

Supplementary Figure 3. Expression of recombinant proteins in *E. coli* BL21. The expression of recombinant proteins in *E. coli* BL21 was analysed by SDS-polyacrylamide gel electrophoresis (SDS-PAGE) and Western Blot. Details on the samples applied in each well are shown in the legend.

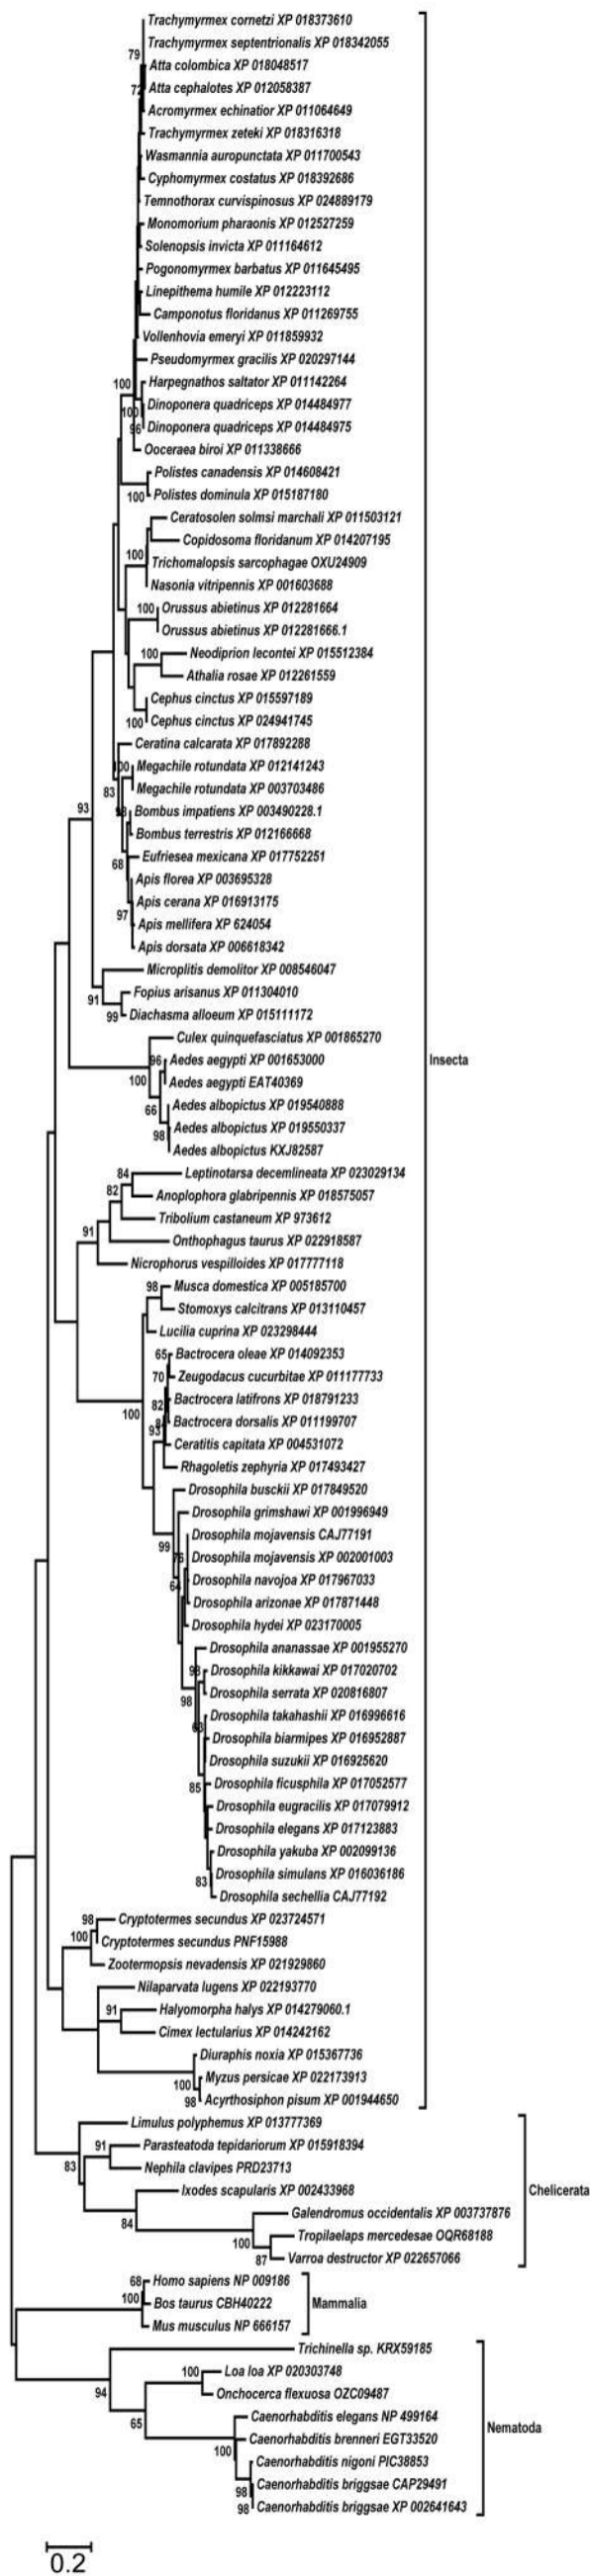

**Supplementary Figure 4.** Phylogenetic tree of B4GALT7 orthologs. The figure displays the phylogenetic relation between B4GALT7 homologs in Insecta, Chelicerata, Mammalia and Nematoda. The tree was built using protein sequences.



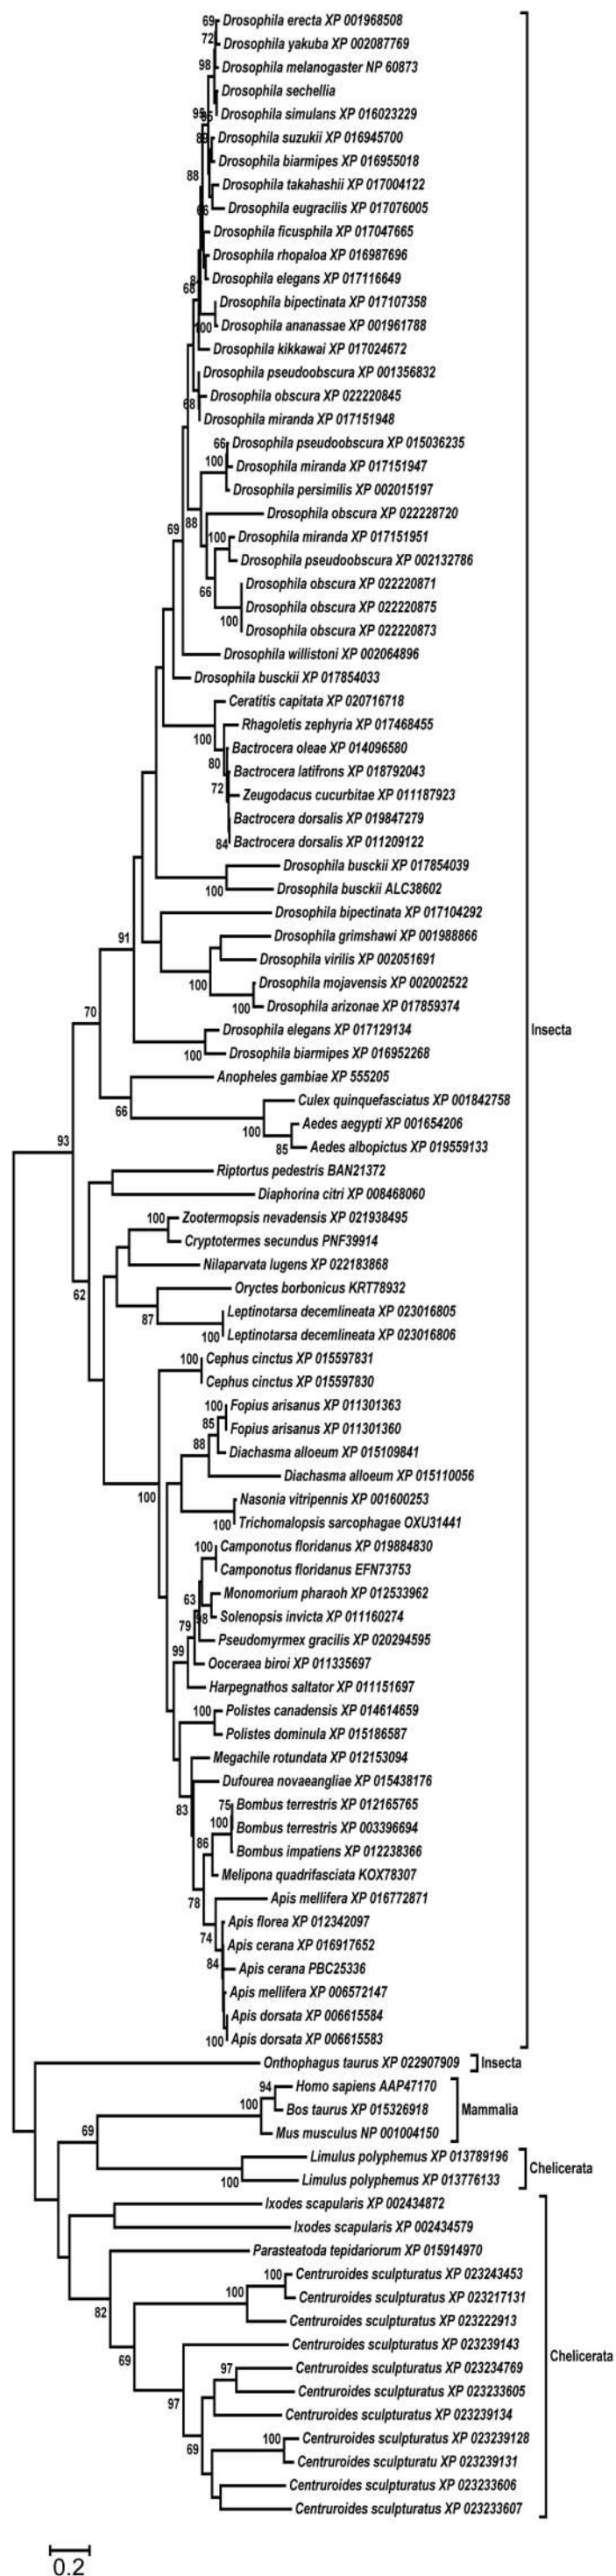

**Supplementary Figure 5.** Phylogenetic tree of A4GALT homologs. The figure displays the phylogenetic relation between A4GALT homologs in Insecta, Chelicerata and Mammalia. The tree was built using protein sequences.

*a4galt-1*

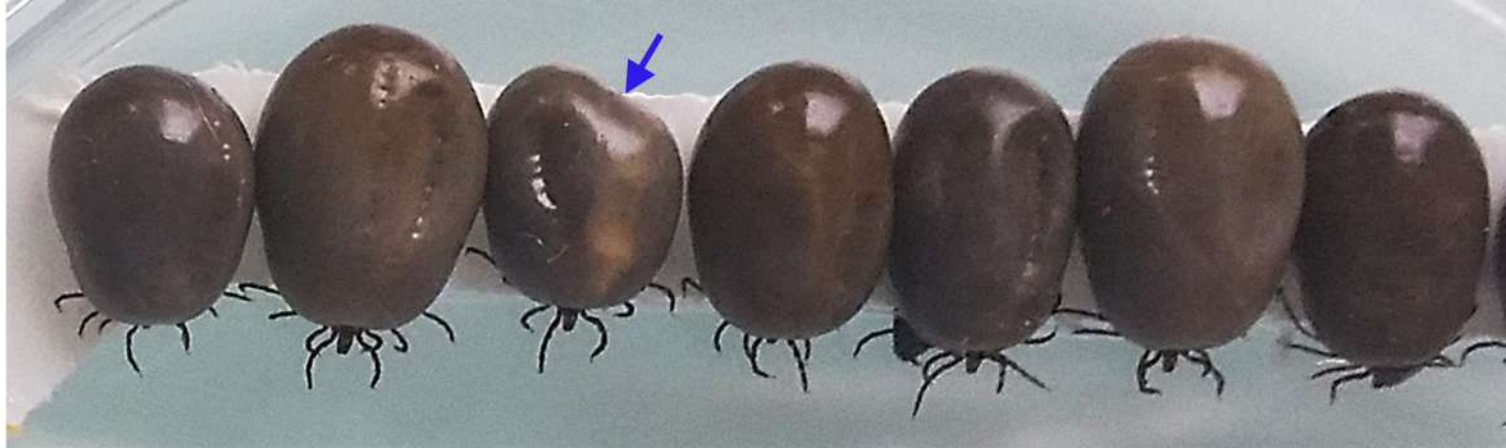

*control*

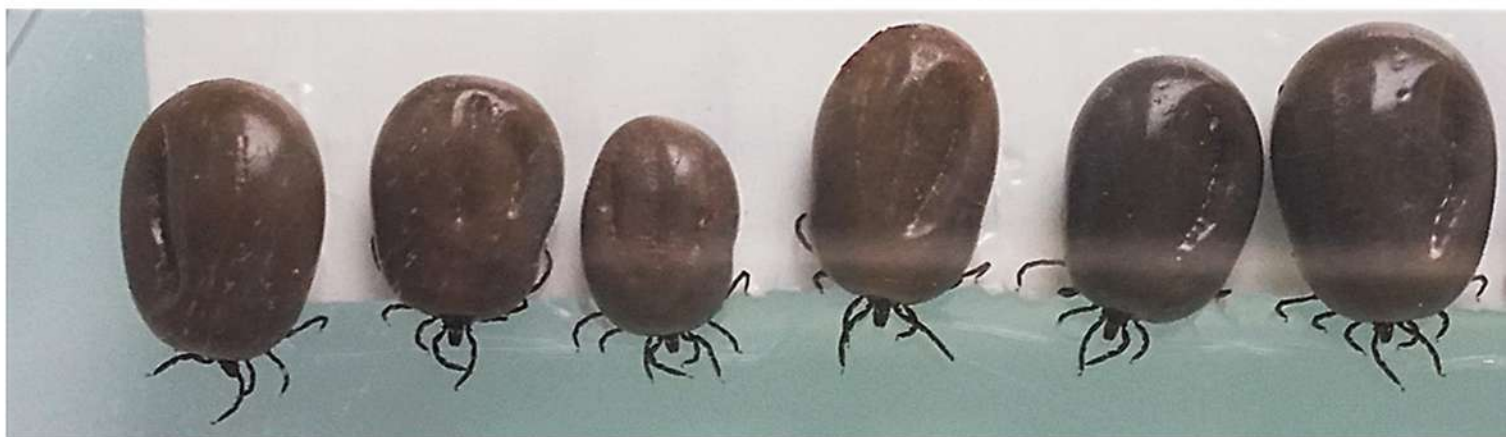

**Supplementary Figure 6.** Morphological abnormalities of *a4galt-1* dsRNA-injected ticks. Abnormal development of the cuticle was a low-frequent event observed in *a4galt-1* dsRNA-treated ticks (blue arrow) and no present in control ticks.

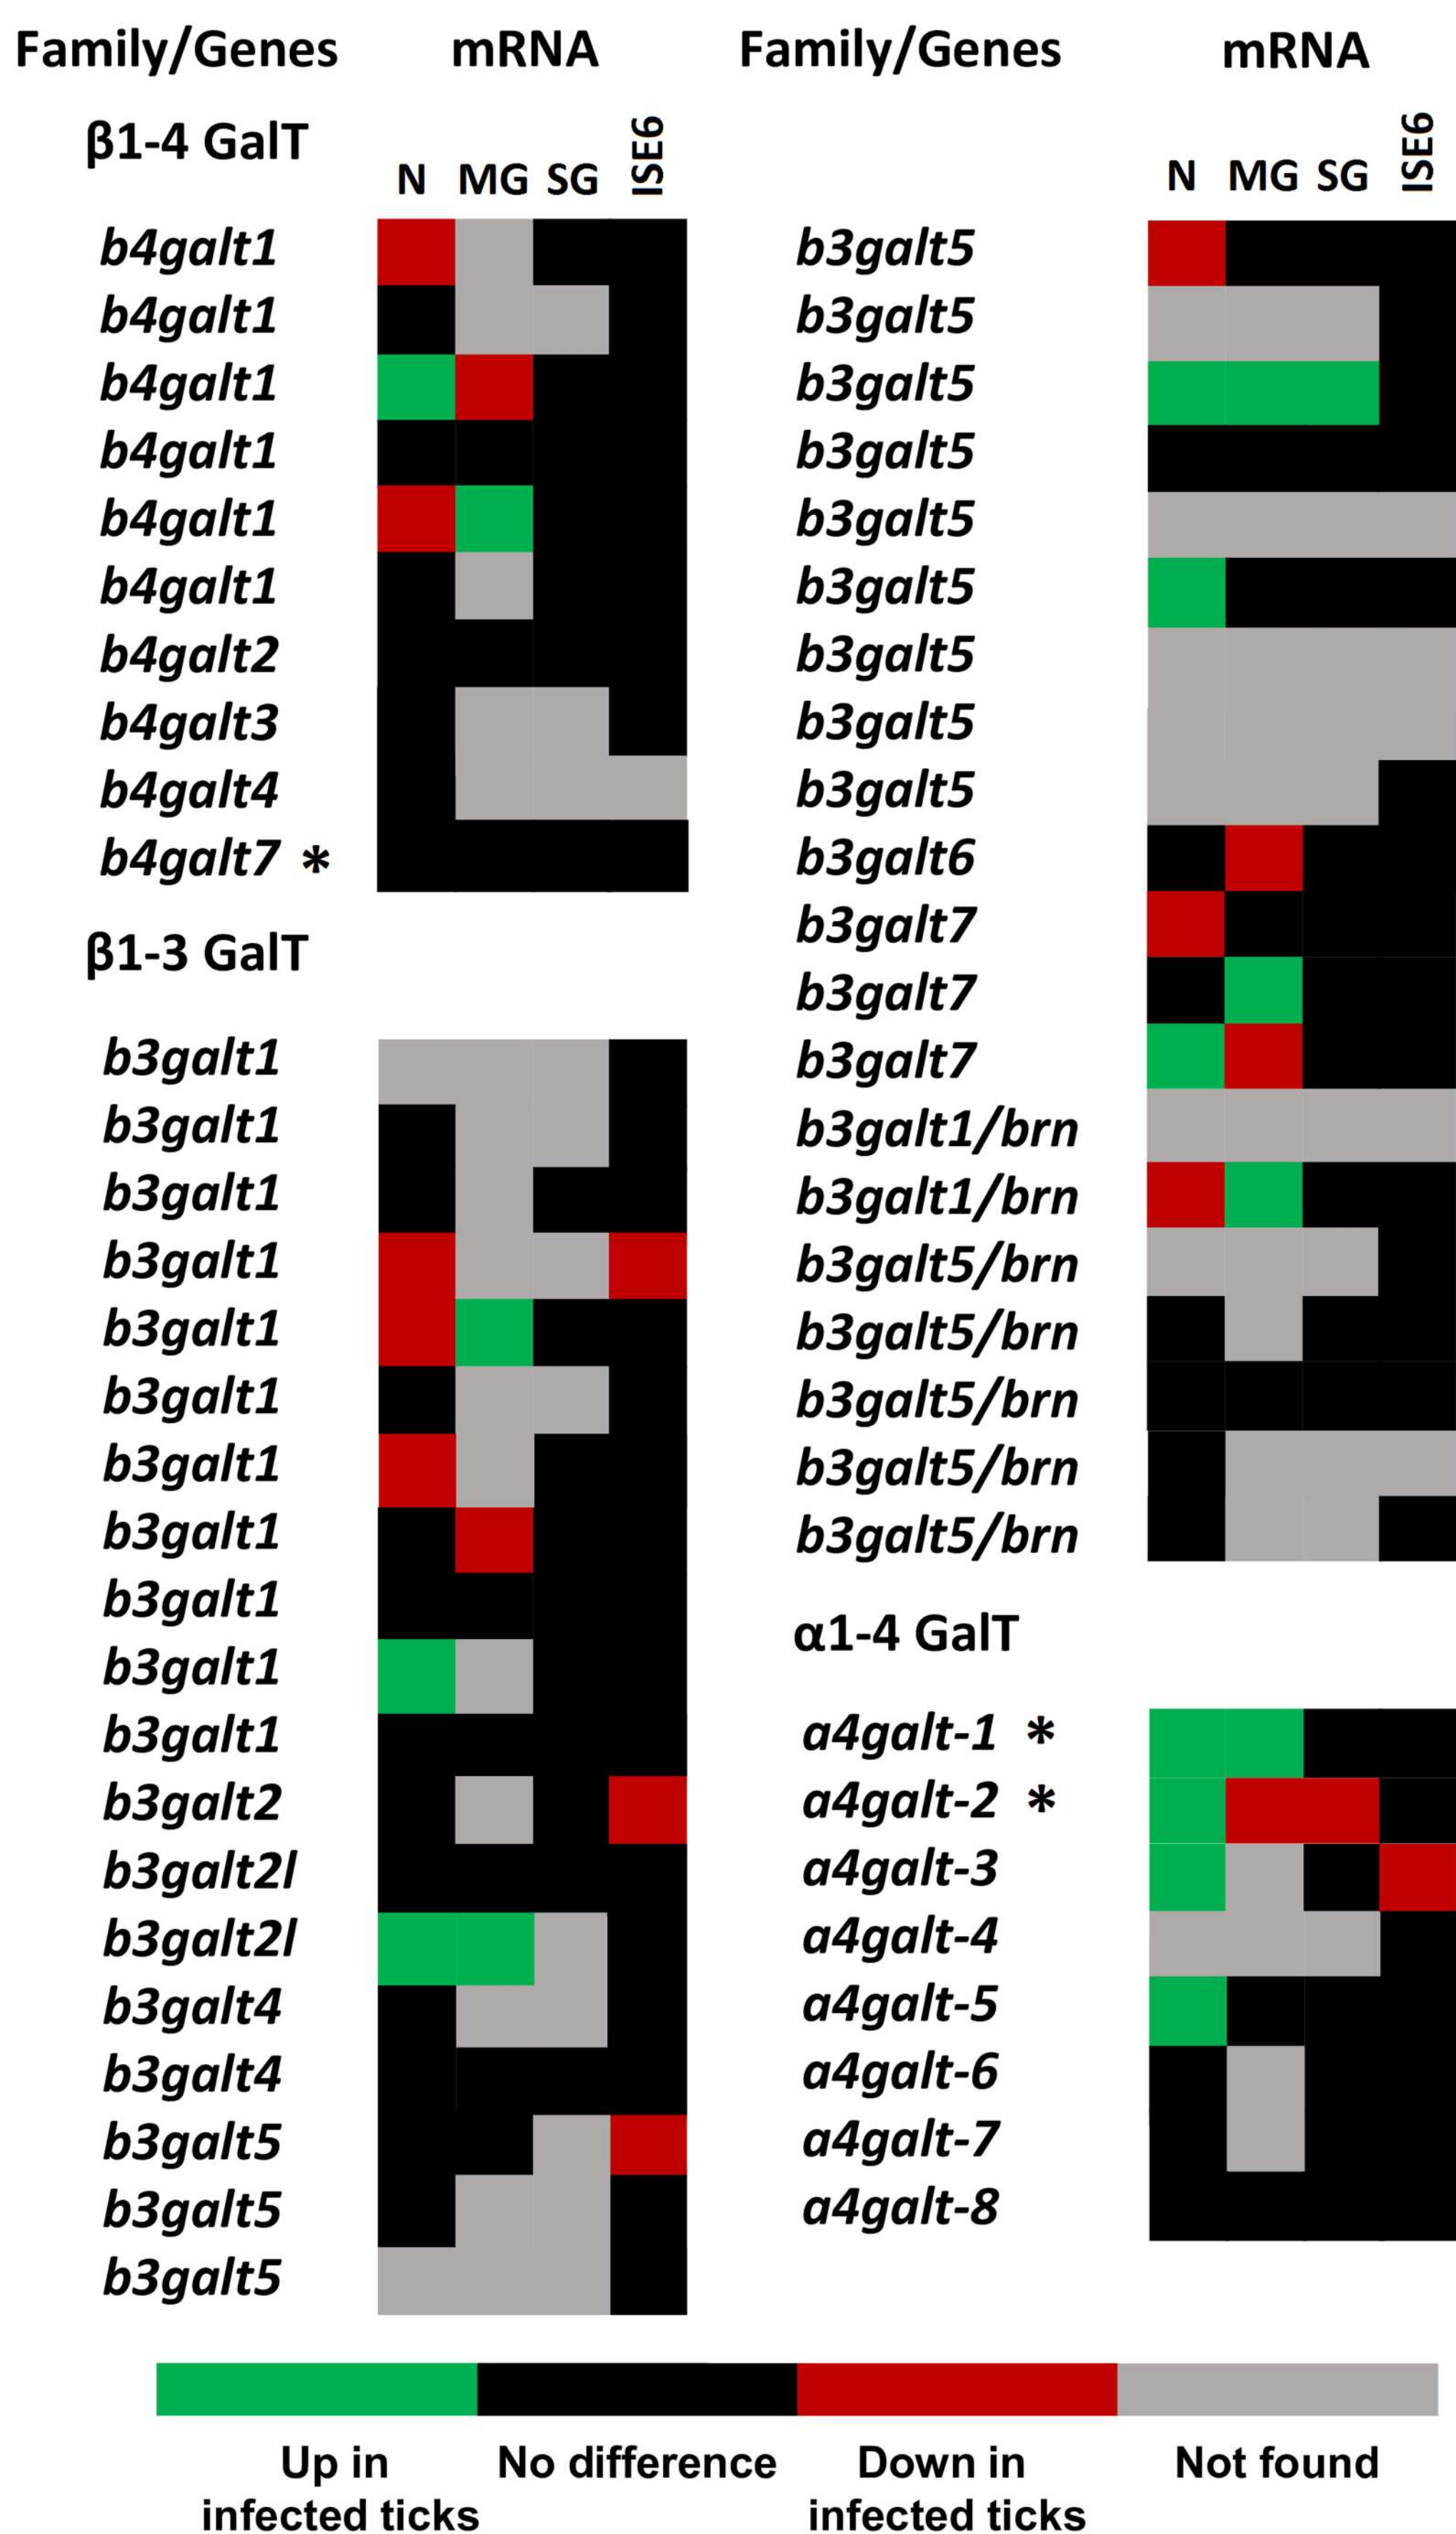

**Supplementary Figure 7.** mRNA and protein levels of the *I. scapularis* GALT enzymes in response to *A. phagocytophilum* infection. Comparison of GALT mRNA and protein levels in *I. scapularis* nymphs (N), female midguts (MG), female salivary glands (SG) and ISE6 cells (ISE6) in response to *A. phagocytophilum* infection. Asterisks show the tick galt genes involved in α-Gal synthesis. Transcriptomics data were obtained from previously published datasets available on the Dryad repository database, NCBI's Gene Expression Omnibus database and ProteomeXchange Consortium via the PRIDE partner repository with the dataset identifier PXD002181 and doi: 10.6019/PXD00218136,37. Name of enzymes are abbreviated as in Table 1.



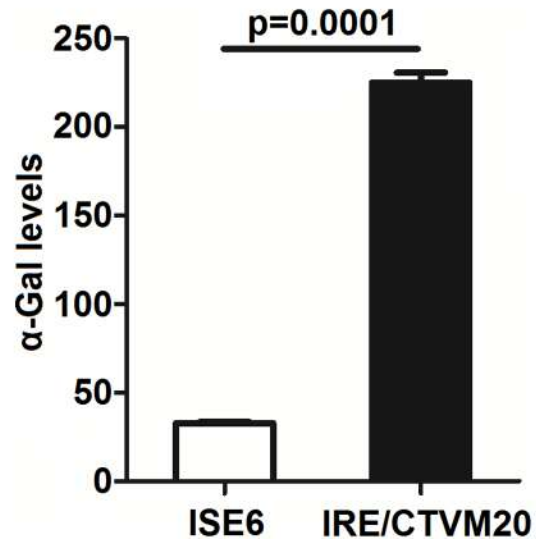

**Supplementary Figure 8.**  $\alpha$ -Gal levels in ISE6 and IRE/CTVM20 cells.  $\alpha$ -Gal levels were measured by immunofluorescence using the  $\alpha$ -Gal-specific monoclonal antibody M86 (primary antibody) and the goat anti-mouse IgM-FITC antibody (secondary antibody). Values in axis y represent mean fluorescence values.

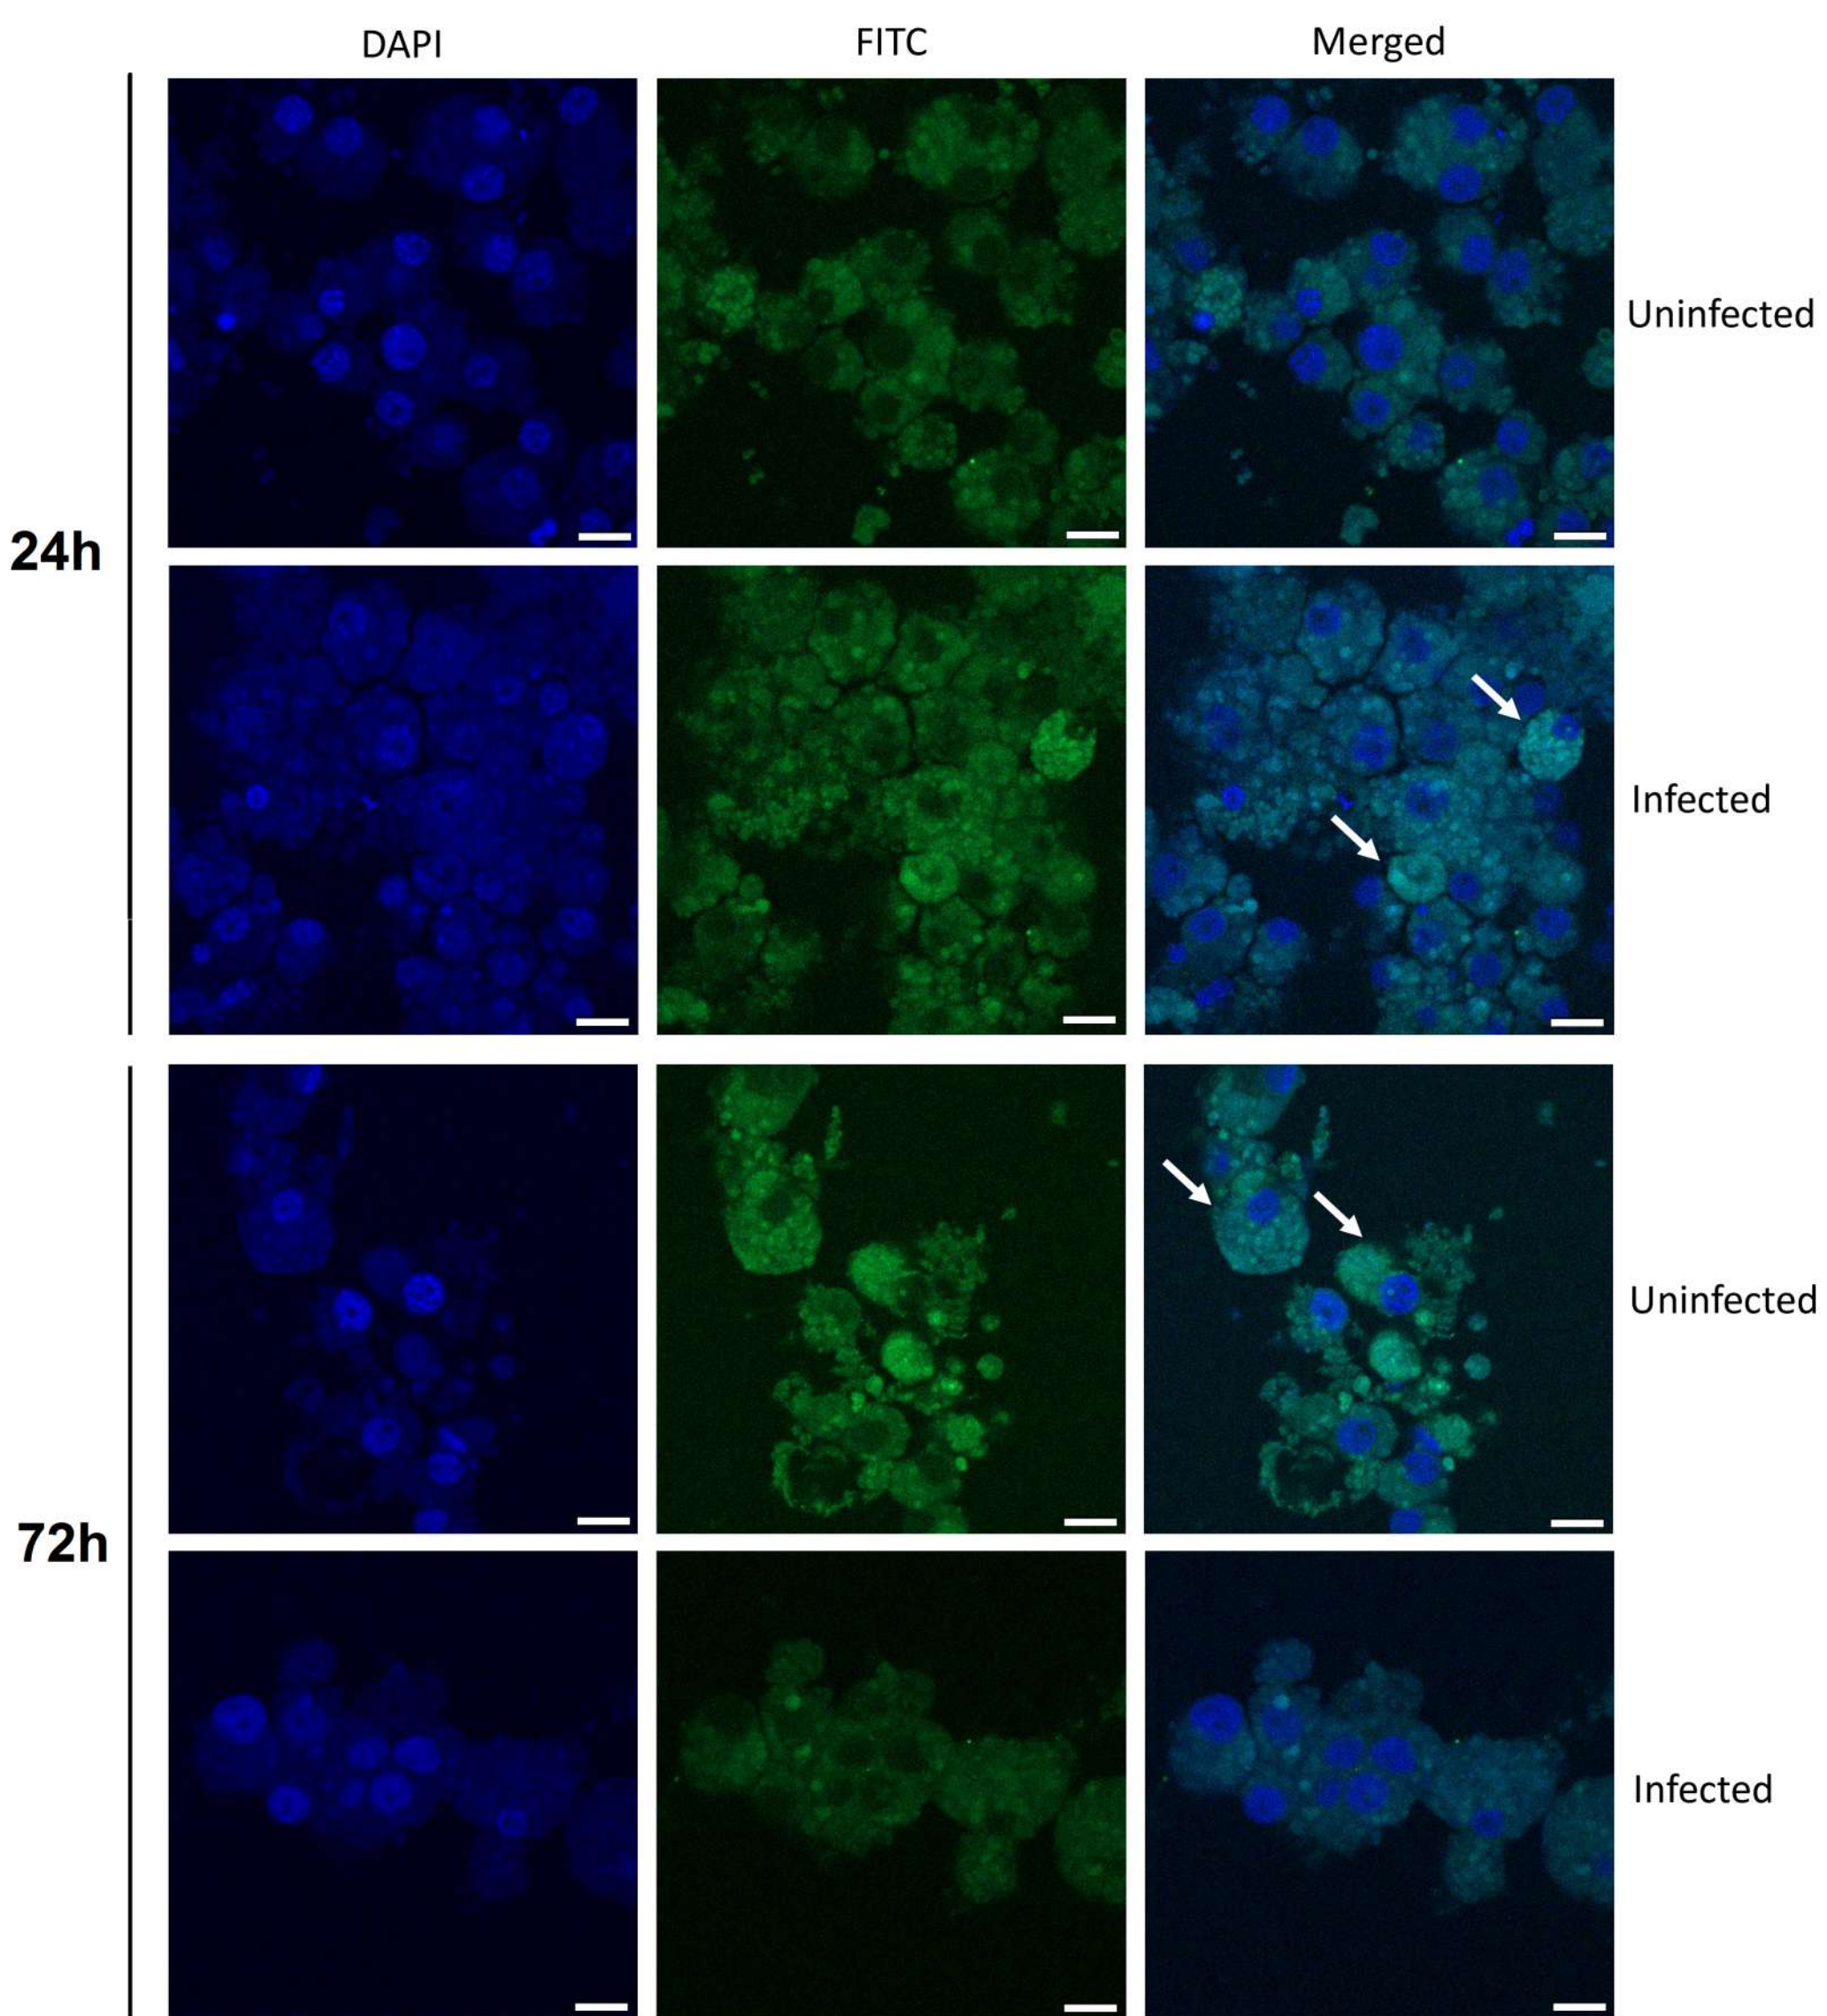

**Supplementary Figure 9.**  $\alpha$ -Gal synthesis is affected by *A. phagocytophilum* infection.  $\alpha$ -Gal levels of *A. phagocytophilum*-infected and non-infected IRE cells were measured by immunofluorescence after 24h and 72h post-infection. Host cell nucleus was stained with DAPI (blue). The  $\alpha$ -Gal-specific monoclonal antibody M86 (primary antibody) and the goat anti-mouse IgM-FITC antibody (secondary antibody) were used to detect  $\alpha$ -Gal (FITC, green). Merged images show that  $\alpha$ -Gal levels are higher in infected and uninfected IRE cells after 24 and 72h post-infection (arrows), respectively. Bars represent 10  $\mu$ m.



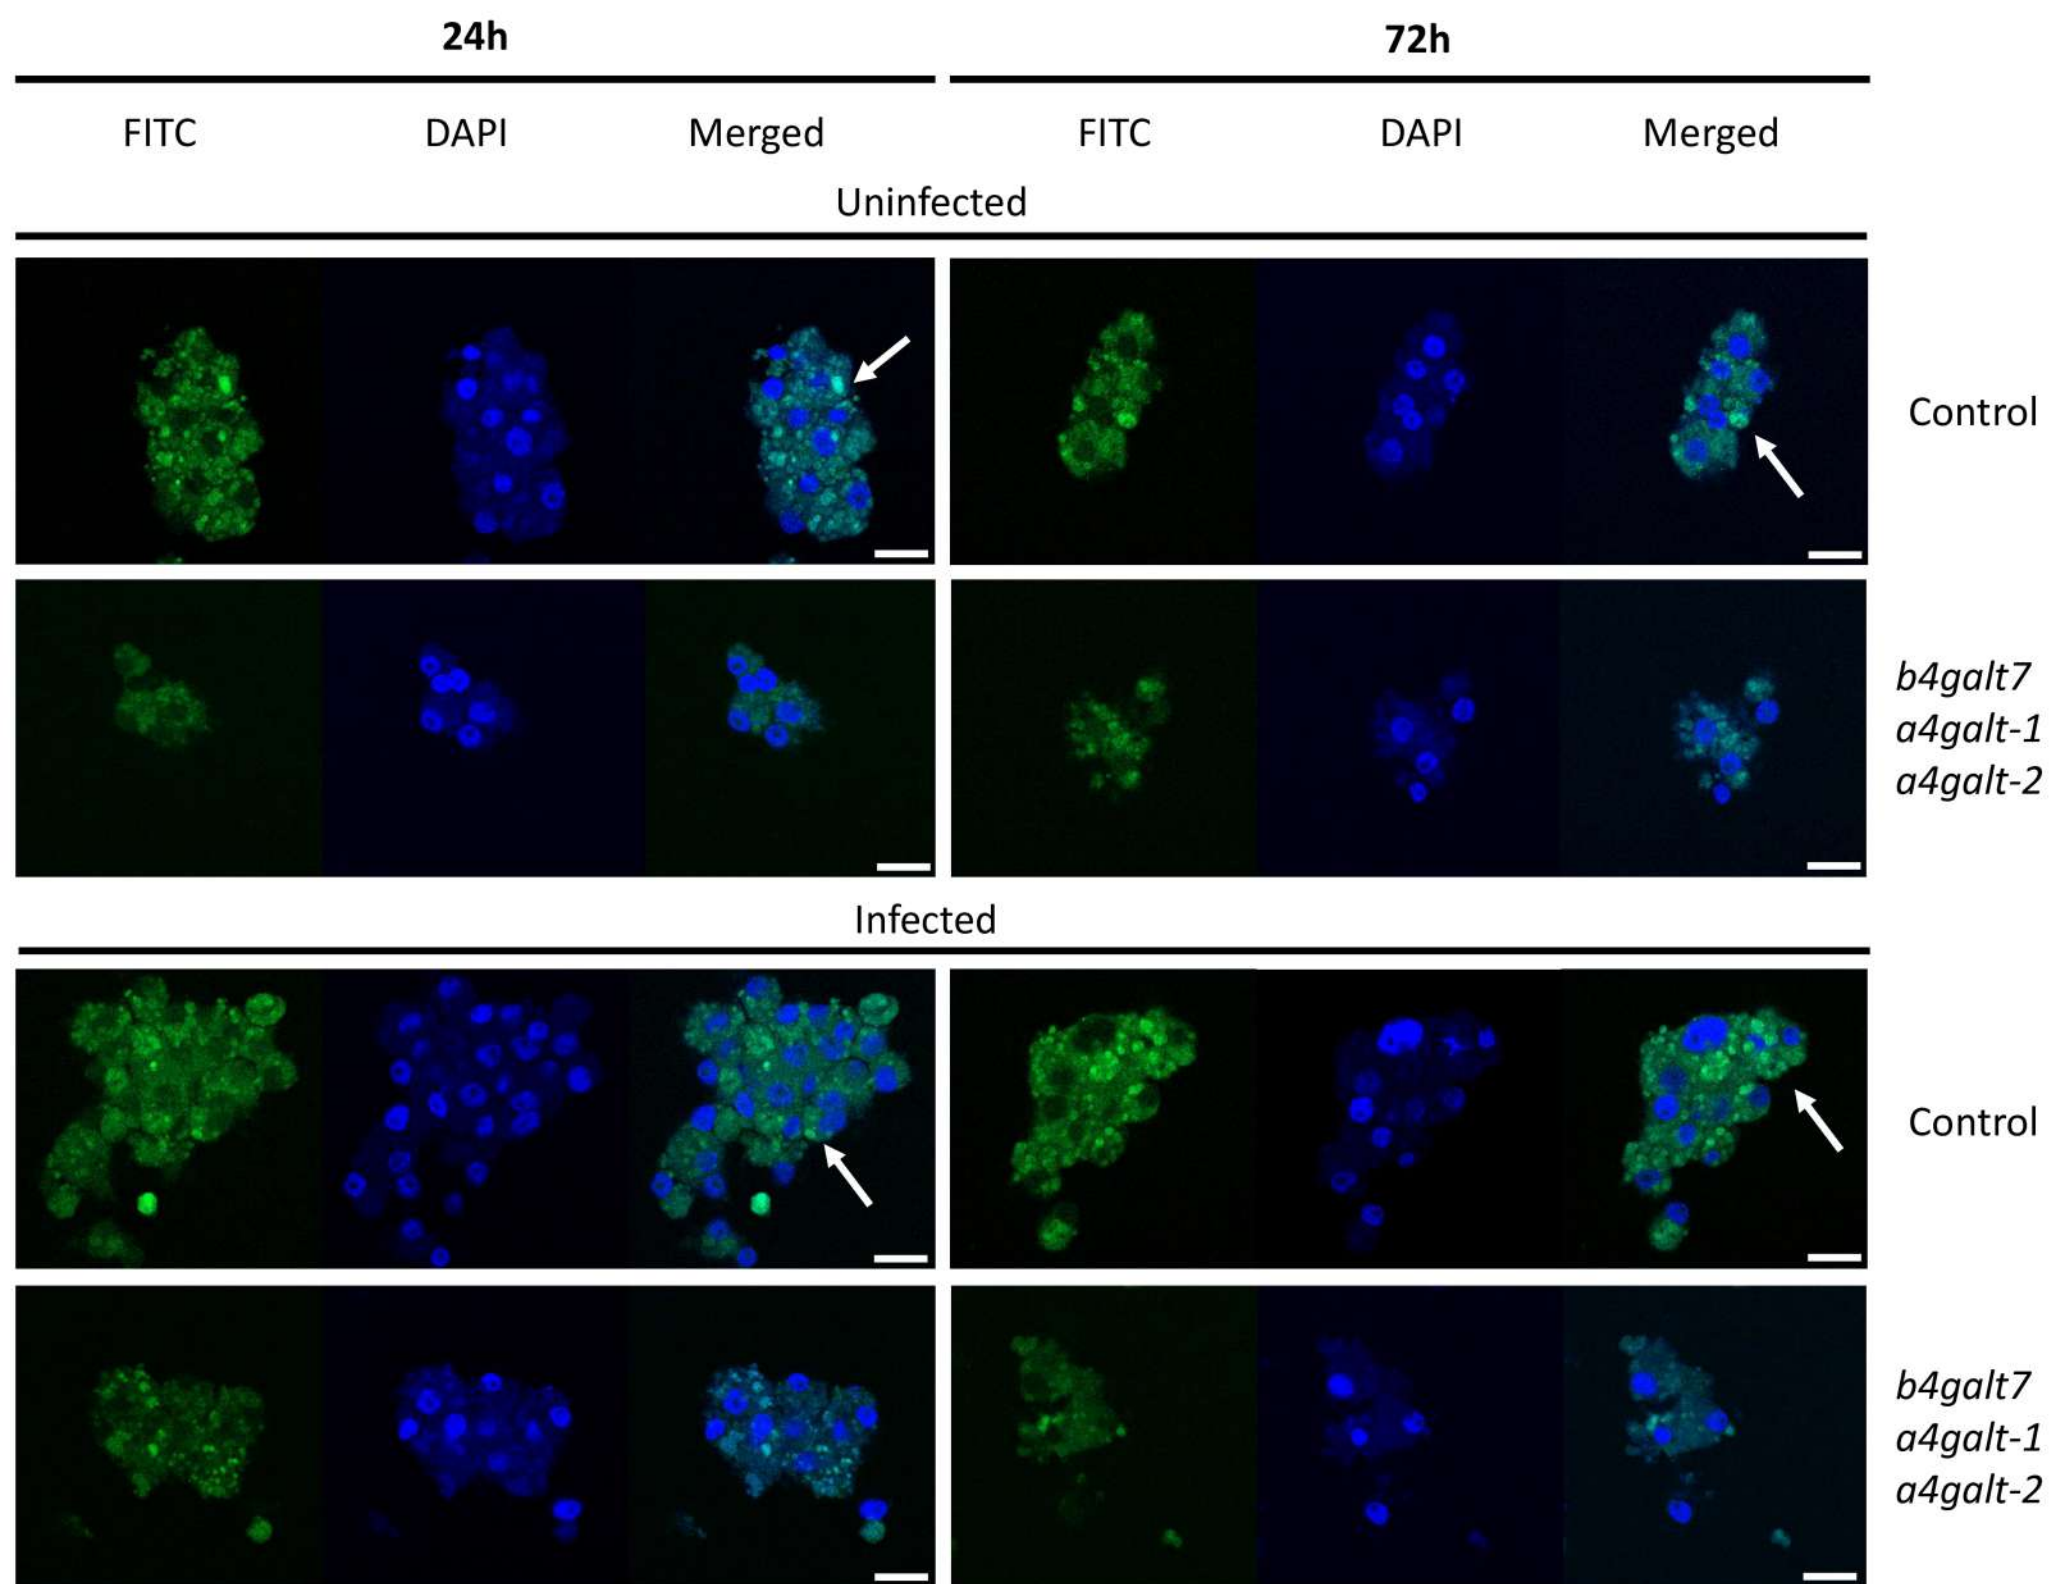

**Supplementary Figure 10.**  $\alpha$ -Gal synthesis is affected by *galt* gene silencing and *A. phagocytophilum* infection.  $\alpha$ -Gal levels of *A. phagocytophilum*-infected and non-infected IRE cells treated with Rs86-specific (Control) or a mix of *b4galt7*, *a4galt-1* and *a4galt-2*-specific siRNAs were measured by immunofluorescence after 24h and 72h post-infection. Host cell nucleus was stained with DAPI (blue). The  $\alpha$ -Gal-specific monoclonal antibody M86 (primary antibody) and the goat anti-mouse IgM-FITC antibody (secondary antibody) were used to detect  $\alpha$ -Gal (FITC, green). Merged images show changes in  $\alpha$ -Gal levels. The arrows show higher  $\alpha$ -Gal levels in Rs86 compared to *b4galt7*, *a4galt-1* and *a4galt-2* siRNA-treated IRE cells at 24h and 72h in infected and uninfected tick cells. Bars represent 10  $\mu$ m.



**Supplementary Table S1. Sequences of oligonucleotide primers for PCR, real-time RT-PCR, cloning and dsRNA synthesis.**

| Target                       |                               | Sense sequence 5'-3' *                                                                                                                 |                                                                                                                                        |
|------------------------------|-------------------------------|----------------------------------------------------------------------------------------------------------------------------------------|----------------------------------------------------------------------------------------------------------------------------------------|
| <i>b4galt7</i><br>ISCW003979 | TOPO101                       | 979T101f <u>CACCACCAGACGCAACATCGAG</u><br>979T101r AGGGAGTAACGGTCAGGTTG                                                                |                                                                                                                                        |
|                              | pcDNA-mRFP                    | 979pcDNAf <u>GCAAGCTTACCAGACGCAACATCGAG</u><br>979pcDNAr <u>GCGAATTCAGGGAGTAACGGTCAGGTTG</u>                                           |                                                                                                                                        |
|                              | RT-PCR                        | 979Frt CGCTGCTCATATCCTTCAGC<br>979Rrt TATCACCACCGACTCCGTTT                                                                             |                                                                                                                                        |
|                              | dsRNA <i>in vivo</i>          | b4galt7f taatacactcactatagggACCAAGACGAGAACGGAGTT<br>b4galt7r taatacactcactatagggTAACTGTCAGGTTGCAGCGT                                   |                                                                                                                                        |
|                              | siRNA <i>in vitro</i>         | Sense979a GAACGGAGUCGGUGGUGAUUU<br>Anti979a AUCACCACCGACUCCGUUCUU<br>Sense979b UCGAAGAUGACGAGUUCUAUU<br>Anti979b UAGAACUCGUCAUCUUCGAUU |                                                                                                                                        |
|                              | <i>a4galt-1</i><br>ISCW024908 | TOPO101                                                                                                                                | 908T101f <u>CACCGCCAAAGCTCTCAACGGCTC</u><br>908T101r AACAGTCTGGCAATATCTGGAC                                                            |
|                              |                               | pcDNA-mRFP                                                                                                                             | 908pcDNAf <u>GCAAGCTTGCCAAAGCTCTCAACGGCTC</u><br>908pcDNAr <u>GCGAATTCAACAGTCTGGCAATATCTGGAC</u>                                       |
|                              |                               | RT-PCR                                                                                                                                 | 908Frt ATTACGAGCGGCATCGCTTA<br>908Rrt AACGTGTCGTCGCAAGGTAA                                                                             |
|                              |                               | dsRNA <i>in vivo</i>                                                                                                                   | a4galt-1f taatacactcactatagggAATGGCTCCAGTTCCTCCAA<br>a4galt-1r taatacactcactatagggATCTGGACACTGTCTCTCT                                  |
|                              |                               | siRNA <i>in vitro</i>                                                                                                                  | Sense908a CGUUGGACGAAGUGGGAAAUU<br>Anti908a UUUCCCACUUCGUCCAACGUU<br>Sense908b AGUAGUAGACUUUGGAAAUUU<br>Anti908b AUUUCCAAAGUCUACUACUUU |
|                              |                               | <i>a4galt-2</i><br>ISCW006262                                                                                                          | TOPO101                                                                                                                                |
| pcDNA-mRFP                   |                               |                                                                                                                                        | 262pcDNAf <u>GCAAGCTTTGTCCCCTGCTTGAGGCCCTG</u><br>262pcDNAr <u>GCGAATTCGAGTGCTCGCGCCAGTGCGTA</u>                                       |
| RT-PCR                       |                               |                                                                                                                                        | 262Frt CTCTCCGGAATCTTGGACTG<br>262Rrt CGACACGAGCATCTTTTTGA                                                                             |
| dsRNA <i>in vivo</i>         |                               |                                                                                                                                        | a4galt-2f taatacactcactatagggATCTTCGACAAGAGACACC<br>a4galt-2r taatacactcactatagggCAGATGTGCACCAAGTAGCT                                  |
| siRNA <i>in vitro</i>        |                               |                                                                                                                                        | Sense262a GCAAUCAGUCGCGACGUUU<br>Anti262a UACGUCGCGACUGAUUUUGCUU<br>Sense262b GCUUCUUGCUUGUGUGGAAUU<br>Anti262b UCCACACAAGCAAGAAGCUU   |
| <i>Rs86</i>                  |                               |                                                                                                                                        | dsRNA                                                                                                                                  |
|                              | siRNA                         |                                                                                                                                        | siRs86 CGGUAAAUGUCGAAGCAAUU                                                                                                            |
|                              |                               |                                                                                                                                        |                                                                                                                                        |
| Tick <i>rpS4</i>             | RT-PCR                        |                                                                                                                                        | For GGTGAAGAAGATTGTCAAGCAGAG<br>Rev TGAAGCCAGCAGGGTAGTTT                                                                               |
| Human <i>β actin</i>         | RT-PCR                        |                                                                                                                                        | For TGATATCGCCGCGCTCGTCGTC<br>Rev GCCGATCCACACGGAGTACT                                                                                 |

\*Restriction enzymes sites or sequences added to facilitate cloning were underlined.

**Supplementary Table S2. Levels of *I. scapularis* protein orthologs with putative  $\alpha$ -Gal modification in response to *A. phagocytophilum* infection.**

| Tick species               | Protein <sup>a</sup> | <i>Ixodes scapularis</i> <sup>b</sup> |         |                             |  |  | Functional annotation                     |
|----------------------------|----------------------|---------------------------------------|---------|-----------------------------|--|--|-------------------------------------------|
|                            |                      | Gene                                  | Protein | Protein levels <sup>c</sup> |  |  |                                           |
|                            | Accession numbers    | ISE6                                  | MG      | SG                          |  |  |                                           |
| <i>Rhipicephalus bursa</i> | C9W1S8               | ISCW010532                            | B7Q8W6  |                             |  |  | Alkyl hydroperoxide reductase             |
|                            | L7M3V3               | ISCW019308                            | B7PSJ8  |                             |  |  | Glutathione S-transferase                 |
|                            | A0A034WXE0           | ISCW017456                            | B7PAR6  |                             |  |  | Heat shock protein                        |
|                            | L7LU17               | ISCW005458                            | B7PQP7  |                             |  |  | Hydroxyacyl-CoA dehydrogenase             |
|                            | L7LX08               | ISCW017192                            | B7P8Q5  |                             |  |  | Hsp70, putative                           |
|                            | L7M2Y0               | ISCW009590                            | B7Q3I5  |                             |  |  | Putative uncharacterized protein          |
|                            | L7MEG0               | ISCW014265                            | B7QI01  |                             |  |  | Hsp90 protein                             |
|                            | L7M755               | ISCW003299                            | B7PBH7  |                             |  |  | NADH-ubiquinone reductase                 |
|                            | A0A034WWU3           | ISCW023777                            | B7QMC8  |                             |  |  | Alpha-macroglobulin, putative             |
|                            | A0A034WYY9           | ISCW020299                            | B7Q349  |                             |  |  | Elongation factor 1-alpha                 |
|                            | A0A034WZ70           | ISCW003527                            | B7PH43  |                             |  |  | Alpha tubulin                             |
|                            | L7LUC2               | ISCW023355                            | B7QL57  |                             |  |  | Adenylyl cyclase-associated protein       |
|                            | L7LVV5               | ISCW007116                            | B7PTR3  |                             |  |  | Limbic system-associated membrane protein |
|                            | L7MAA0               | ISCW011988                            | B7QCK2  |                             |  |  | ATP synthase subunit alpha                |
|                            | L7MAE4               | ISCW012934                            | B7QAM1  |                             |  |  | Chaperonin complex component, TCP-1 theta |
|                            | L7MAG2               | ISCW004404                            | B7PE75  |                             |  |  | Fascin                                    |
|                            | L7MAL5               | ISCW006566                            | B7PPR8  |                             |  |  | FK506 binding protein (FKBP)              |
|                            | L7MAR2               | ISCW002080                            | B7PBW3  |                             |  |  | Protein disulfide isomerase 1             |
|                            | L7MIL3               | ISCW020189                            | B7PZG8  |                             |  |  | Aldehyde dehydrogenase                    |
| <i>Hyalomma marginatum</i> | A0A131XK53           | ISCW012509                            | B7QE46  |                             |  |  | ATP synthase subunit beta                 |

<sup>a</sup> Data collected from <sup>21</sup>.

<sup>b</sup> ISE6 data was collected from <sup>37</sup> and MG and SG data was collected from <sup>36</sup>.

<sup>c</sup> Colors represent up (green) and down (red) in infected cells or tick tissues. White represent that the protein was not-found.
